# Supplementary material
Source: ML conference proceedings conference paper supplement (https://openreview.net/forum?id=rrHU3gtETG9)
Supplement: supplementary_material [file attachment]

## Supplementary Materials

Questions

Users

Help

2

answers

-7

votes

945

views

What does like '%aa%' do in sql?

Why does like '%aa%' exactly do ? is it case sensitive ?

sql mysql

asked Aug 3 at 10:19

GLV\$54T

22

1

1

answers

-3

votes

3k

views

Python: Beginning problems

ok so basically i very new to programming and have no idea how to go about these problems help if you will ^^

Numerologists claim to be able to determine a person's character ...

python

asked Jul 23 at 2:47

NewBPY

1

2

answers

1

votes

5k

views

How to make text thinner in CSS?

When I put in a `<h1>` tag, the text looks like it has been bolded. How do we make text thinner in CSS?

css

asked Jul 6 at 17:23

Mononoke66

11

1

2

answers

-7

votes

69k

views

What does "||" means in Java?

When studying my Java courses, this two signs `||` appeared but I still can't find their function or meaning. Can someone clear this doubt please?

java

asked Jun 22 at 8:57

Samosas

3 - 1 + 3

1

1

answers

0

votes

318

views

I can't reach the last node in Linked list

I have a linked-list (actually stack, but implemented using LL). I can't reach the last node. I don't know what I'm doing wrong. I searched all over Stack...

C++

asked Jun 19 at 21:22

Puppy414

7 - 1 + 1

1

2

answers

0

votes

230

views

Why does my function call not print out what it's supposed to?

I wrote a simple python class with a function. When I call my function I expect it to print "hi this is a test" but it does not. It does not give any errors either. Do you know wh...

python

asked Jun 4 at 12:15

NewBPY

1

3

answers

-1

votes

178

views

delivering a website to a company [closed]

i want to create a website for a company, how should i deliver it to them? thanks

java

asked Nov 3, 20 at 22:17

Mononoke66

11

1

1

answers

0

votes

45

views

Is it possible to move a simple .exe tool to cloud for multi-users?

A few years back, we had a programmer create a type of calculator for use in the audio industry. It was creat...

cloud

asked Aug 4, 19 at 23:36

ItsMe

2 - 1 + 1

1

Figure 1- The prototype's home page



SS129k
1098 reputation = 1080 + 

1098 REPUTATION

3

6

12

Questions

Answers

[delivering a website to a company \[closed\]](#)

Nov 3, 20 at 22:35



[What does like '%aa%' do in sql?](#)

Aug 3 at 10:34

[I can't reach the last node in Linked list](#)

Jun 19 at 21:42

[What does " || " means in Java?](#)

Jun 23 at 18:34



[Why does my function call not print out what it's supposed to?](#)

Jun 4 at 18:05

Comments

[I can't reach the last node in Linked list -](#)

Jun 23 at 13:35



Don't worry, at some point you will have learned it by heart ;)

[What does " || " means in Java? -](#)

Jun 22 at 14:47



Why these many downvotes ?? Looks like a valid question to me. Where is SO going...

[What does like '%aa%' do in sql? -](#)

Aug 3 at 11:42



@GLV\$\$AT it is case in-sensitive . ignore the negative votes. it is a good quest...

[delivering a website to a company \[closed\] -](#)

Nov 3, 20 at 23:45



@MasterMind, be nice. Obviously the poster is a beginner and this holds for aski...

Figure 2 - Sample user profile page from the prototype
